# Supplementary material
Source: PubMed Central journal article supplement (PMC3584880)
Supplement: IAI.00813-12_zii9990999995so1.pdf [file IAI.00813-12_zii9990999995so1.pdf]

## Supplementary Tables

**Table S1: Primers used in the study.**

| Name                                           |      |                                                                |
|------------------------------------------------|------|----------------------------------------------------------------|
| <b>Construction of <math>\Delta</math>yeaJ</b> |      |                                                                |
| Name                                           | #    | DNA Sequence (5'-3') <sup>a</sup>                              |
| YeaJ-TU                                        | 319  | TATGGTAAACTAACGCATCCGACTTTTCAGGGCTGTAGTTCATC TAGACAGCTGCATGCAT |
| YeaJ-TD                                        | 320  | CCATTTCTCACTCCTGGTGCAATATGAACATTTACTGCGAAGCAGTGTAGGCTGGAGCTG   |
| YeaJ-F1U                                       | 321  | GCGACAATAGTCACGACTGAA                                          |
| YeaJ-F1D                                       | 322  | CCAGCGCAGTACCACGTATT                                           |
| YeaJ-F2U                                       | 348  | CAGTCTATTAGAGGAATTCTCATCG                                      |
| YeaJ-F2D                                       | 349  | CGCGTTCTCCTGGGTTAATA                                           |
| YeaJ-MU                                        | 350  | CCGACTTTCAGGGCTGTAGTTCATCTGCTTCGCAGTAAATGTTTCATATTG            |
| YeaJ-MD                                        | 351  | CAATATGAACATTTACTGCGAAGCAGATGAACTACAGCCCTGAAAGTCGG             |
| ThyA-F                                         | 395  | ATGATGGTTTGGGCATATCG                                           |
| ThyA-R                                         | 396  | ACGAGCGCCAAATACAGATT                                           |
| <b>Construction of pYeaJ</b>                   |      |                                                                |
| Name                                           | #    | DNA Sequence (5'-3') <sup>a</sup>                              |
| YeaJ-F- <i>Xba</i> I                           | 364  | GCTCTAGACAGTCTATTAGAGGAATTCTCATCG                              |
| YeaJ-R- <i>Hind</i> III                        | 365  | CCCAAGCTT CGCGTTCTCCTGGGTTAATA                                 |
| pBAD-F                                         | 405  | ATGCCATAGCATTTTTATCC                                           |
| pBAD-R                                         | 406  | GATTTAATCTGTATCAGG                                             |
| <b>Construction of pWYeaJ</b>                  |      |                                                                |
| <b>YeaJ-F-<i>Sma</i>I</b>                      | 495  | CGTACCCGGGGCGACAATAGTCACGACTGAA                                |
| <b>YeaJ-F-<i>Hind</i>III</b>                   | 365  | CCCAAGCTT CGCGTTCTCCTGGGTTAATA                                 |
| M13-20                                         | M13  | GTAAAACGACGGCCAGT                                              |
| M13 Reverse                                    | M13R | CATGGTCATAGCTGTT                                               |

<sup>a</sup> Underlining indicates restriction endonuclease recognition sites
